# Supplementary material
Source: PubMed Central journal article supplement (PMC4078283)
Supplement: amiajnl-2013-002501-s1.pdf [file amiajnl-2013-002501-s1.pdf]

## Online supplementary appendix 1: Classification of outcomes

Information about tables: The tables show the outcome data organized across study designs and intervention types. We distinguished between RCTs, observational studies (retrospective, cross-sectional, longitudinal), and qualitative (interviews and focus groups). In terms of intervention types, we distinguished between evaluations of an entire portal [portal]; of one module [module]; and of a program/service (often disease management program) offered via a portal [program]. The outcome data is organized based on the strength of outcomes. For the three study designs, we made the following stratifications:

### RCTs:

- No statistically significant effect\*
- Significant effect, but lacking consistency across different outcome measures and/or population subgroups \*\*
- Significant effect, but not sustained over time\*\*\*
- Statistically significant effect\*\*\*\*

### Observational studies:

- No effect\*
- Statistically significant effect or large effect untested for significance, but inconsistent across patients, measures etc.\*\*
- Statistically significant effect or large effect untested for significance \*\*\*

### Qualitative studies

- Mainly positive effects (Pos)
- No effects (No)
- Mainly negative effects (Neg)

The numbers in the tables correspond to the study ID numbers listed in Online supplementary appendix 2.

|                              | 1. Clinical outcomes |        |         | 2. Health resource consumption |        |         | 3. Patient adherence |        |         |
|------------------------------|----------------------|--------|---------|--------------------------------|--------|---------|----------------------|--------|---------|
|                              | Portal               | Module | Program | Portal                         | Module | Program | Portal               | Module | Program |
| <b>RCTs</b>                  |                      |        |         |                                |        |         |                      |        |         |
| ****                         |                      |        | 9; 10   | 13; 15                         |        |         | 15                   | 19; 21 |         |
| ***                          |                      |        | 8       |                                |        |         |                      | 20     |         |
| **                           |                      |        | 6; 7    | 16                             |        | 7       | 16                   |        |         |
| *                            | 1                    |        | 11      |                                |        | 9       |                      |        |         |
| <b>Observational studies</b> |                      |        |         |                                |        |         |                      |        |         |
| ***                          | 2                    | 4; 5   |         | 14; 17                         | 4      |         | 18                   |        |         |
| **                           | 3                    |        |         | 12 <sup>1</sup>                |        |         |                      |        |         |
| *                            |                      |        |         |                                |        |         |                      |        |         |
| <b>Qualitative studies</b>   |                      |        |         |                                |        |         |                      |        |         |
| Pos.                         |                      |        |         | 12 <sup>2</sup>                |        |         |                      |        |         |
| No                           |                      |        |         |                                |        |         |                      |        |         |
| Neg.                         |                      |        |         |                                |        |         |                      |        |         |

12<sup>1</sup> 12<sup>2</sup> A mixed methods approach was used
