# Supplementary material
Source: PubMed Central journal article supplement (PMC4078283)
Supplement: amiajnl-2013-002501-s3.pdf [file amiajnl-2013-002501-s3.pdf]

### Online supplementary appendix 3: health service networks

| Type of health service network                                   | Name of health service network                       | Number of studies from health service network |
|------------------------------------------------------------------|------------------------------------------------------|-----------------------------------------------|
| Academic hospitals with health systems providing integrated care | Beth Israel Deaconess Medical Center, MA             | 3                                             |
|                                                                  | University of Missouri Health Care, MO               | 1                                             |
|                                                                  | Duke University Medical Center, NC                   | 1                                             |
|                                                                  | Vanderbilt University Medical Center, TN             | 1                                             |
|                                                                  | Cleveland Clinic, OH                                 | 1                                             |
|                                                                  | University of Colorado Hospital, CO                  | 2                                             |
|                                                                  | UW Medicine, WA                                      | 1                                             |
|                                                                  | Georgia Regents Health System, GA                    | 1                                             |
|                                                                  | Carolinas HealthCare System, NC and SC               | 1                                             |
|                                                                  | University of Pittsburgh Medical Center, PA          | 1                                             |
| Integrated delivery systems with own health plan                 | Kaiser Permanente, CA and CO                         | 4                                             |
|                                                                  | Group Health Cooperative, WA                         | 4                                             |
|                                                                  | Veterans Health Administration                       | 3                                             |
|                                                                  | Partners HealthCare, MA                              | 3                                             |
| Multispecialty group practices                                   | Harvard Vanguard Medical Associates, MA              | 1                                             |
|                                                                  | Palo Alto Medical Foundation, CA                     | 1                                             |
|                                                                  | 8 primary care practices from private medical group  | 1                                             |
| Independent portals in hospital clinics or networks              | Radboud Hospital's Fertility clinic, the Netherlands | 1                                             |
|                                                                  | The University Health Network Ontario, Canada        | 1                                             |
